# Supplementary material for: Inequalities in the burden of female breast cancer in Brazil, 1990–2017
Source: PubMed Central journal article supplement (PMC7525962; doi:10.1186/s12963-020-00212-5), 2020-09-30
Supplement: 12963_2020_212_MOESM3_ESM.pdf [file 12963_2020_212_MOESM3_ESM.pdf]

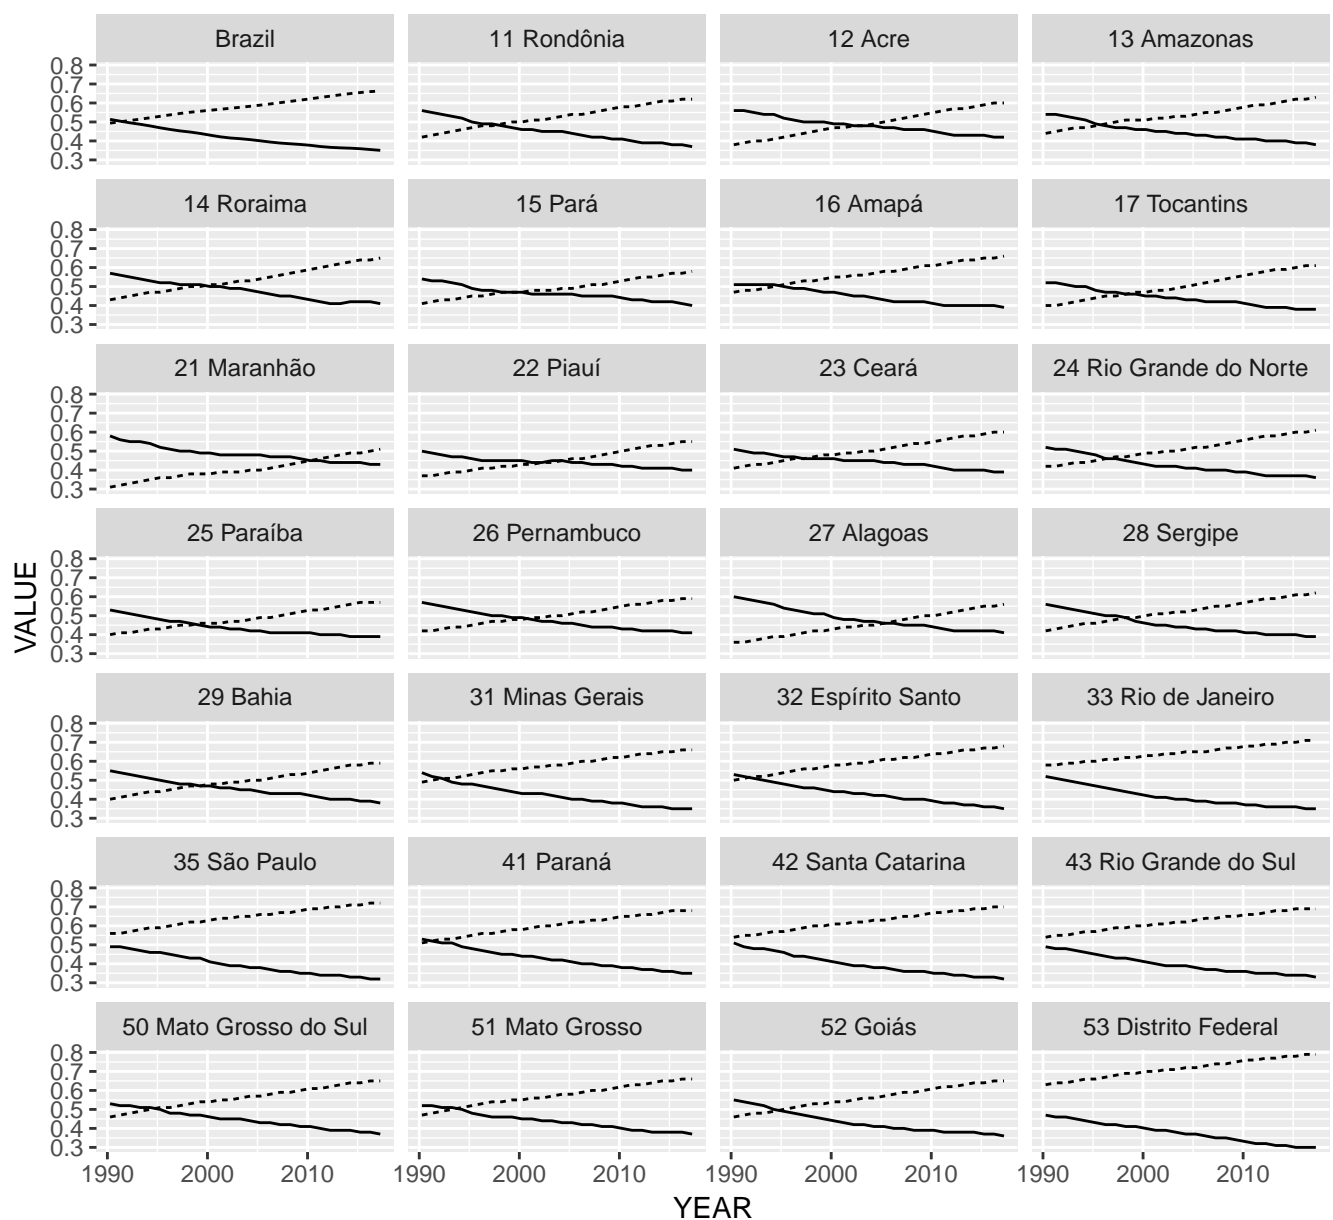

VARIABLE — MIR - - - SDI
